# Supplementary material for: FeNi LDH/V2CTx/NF as Self-Supported Bifunctional Electrocatalyst for Highly Effective Overall Water Splitting
Source: MDPI journal article supplement (doi:10.3390/nano12152640), 2022-07-31
Supplement: s1 [file s1]

## Supplementary Information

# FeNi LDH/V<sub>2</sub>CT<sub>x</sub>/NF as Self-Supported Bifunctional Electrocatalyst for Highly Effective Overall Water Splitting

Liming Yang <sup>1</sup>, Tao Yang <sup>1,\*</sup>, Yafeng Chen <sup>1</sup>, Yapeng Zheng <sup>1</sup>, Enhui Wang <sup>1</sup>, Zhentao Du <sup>2</sup>, Kuo-Chih Chou <sup>1</sup> and Xinmei Hou <sup>1,\*</sup>

<sup>1</sup> Beijing Advanced Innovation Center for Materials Genome Engineering, Collaborative Innovation Center of Steel Technology, University of Science and Technology Beijing, Beijing 100083, China; yangliming0619@163.com (L.Y.); yafeng\_chen2013@163.com (Y.C.); zhengyapeng1994@163.com (Y.Z.); wangenhui@ustb.edu.cn (E.W.); kcc126@126.com (K.-C.C.)

<sup>2</sup> MOE Key Laboratory of New Processing Technology for Non-ferrous Metals and Materials, Guangxi Key Laboratory of Processing for Non-Ferrous Metals and Featured Materials, Guangxi University, Nanning 530004, China; zhentaodu@126.com

\* Correspondence: yangtaoustb@ustb.edu.cn (T.Y.); houxinmeiustb@ustb.edu.cn (X.H.)

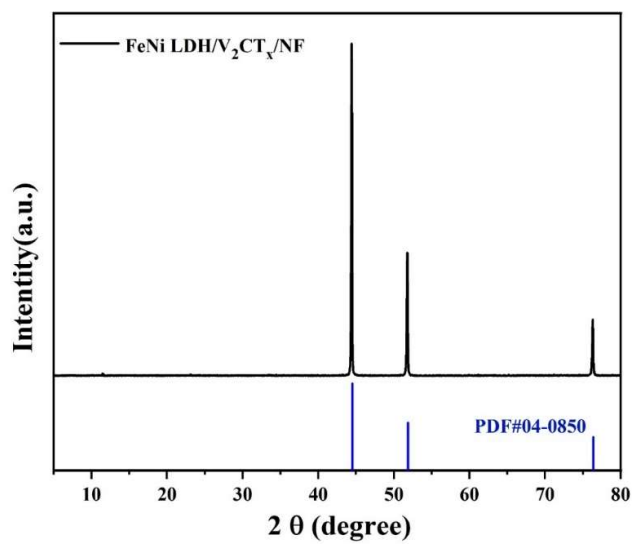

**Figure S1.** XRD patterns of FeNi LDH/V<sub>2</sub>CT<sub>x</sub>/NF.

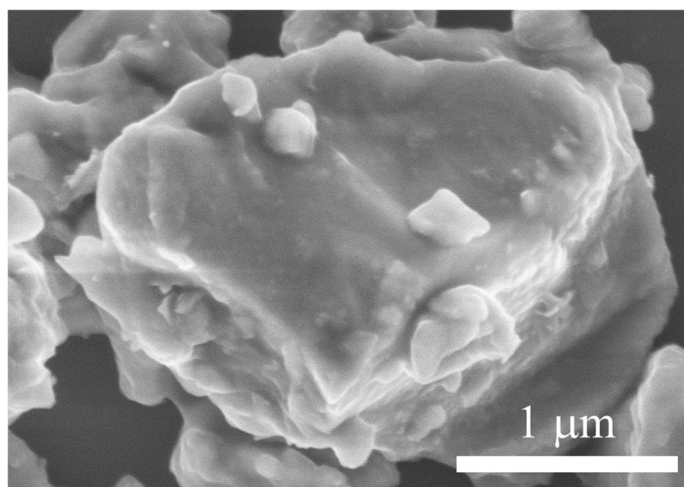

**Figure S2.** The SEM images of pristine V<sub>2</sub>AlC powders.

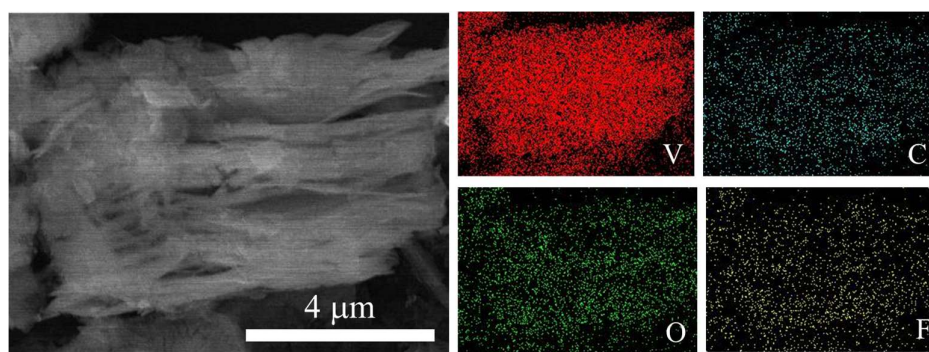

**Figure S3.** Elemental mapping showing the uniform distribution of V, C, O and F elements.

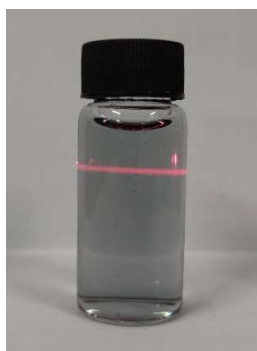

**Figure S4.** Optical image of  $V_2CT_x$  nanohybrids with the corresponding Tyndall effect.

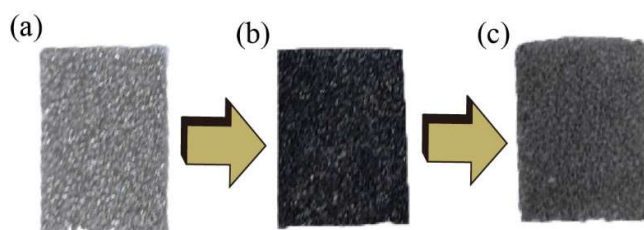

**Figure S5.** Optical image of (a) the bare NF, (b) the  $V_2CT_x/NF$ , (c) the  $FeNi\ LDH/V_2CT_x/NF$  in  $V_2CT_x$  nanohybrids.

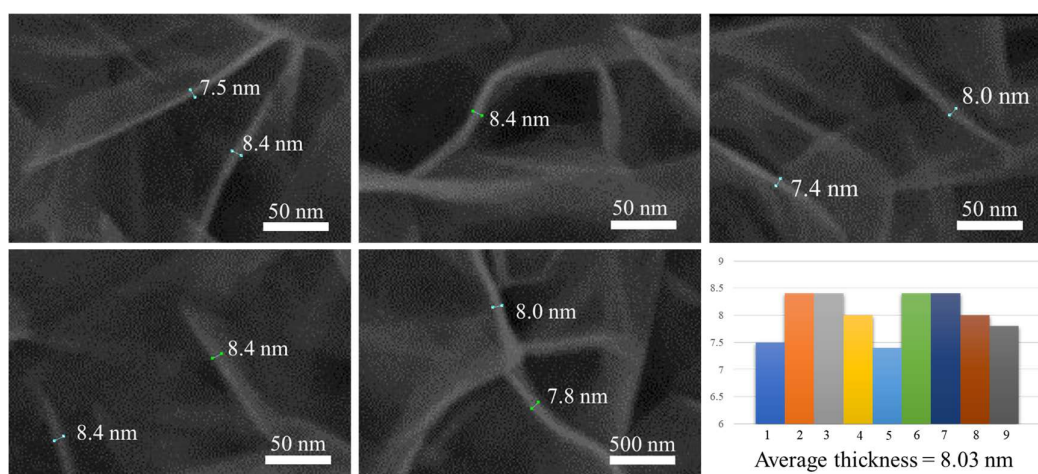

**Figure S6.** Average thickness of  $FeNi\ LDH$  nanosheets at different positions.

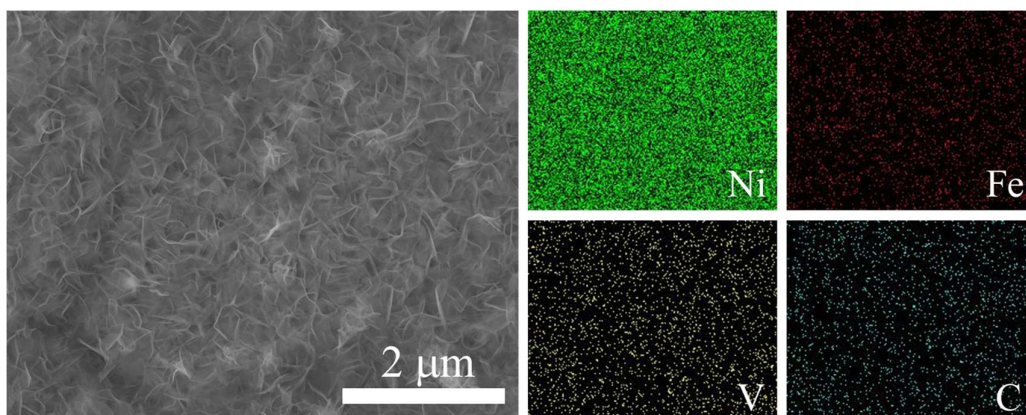

**Figure S7.** Elemental mapping showing the uniform distribution of Ni, Fe, V and C elements in FeNi LDH/V<sub>2</sub>CT<sub>x</sub>/NF nanohybrids.

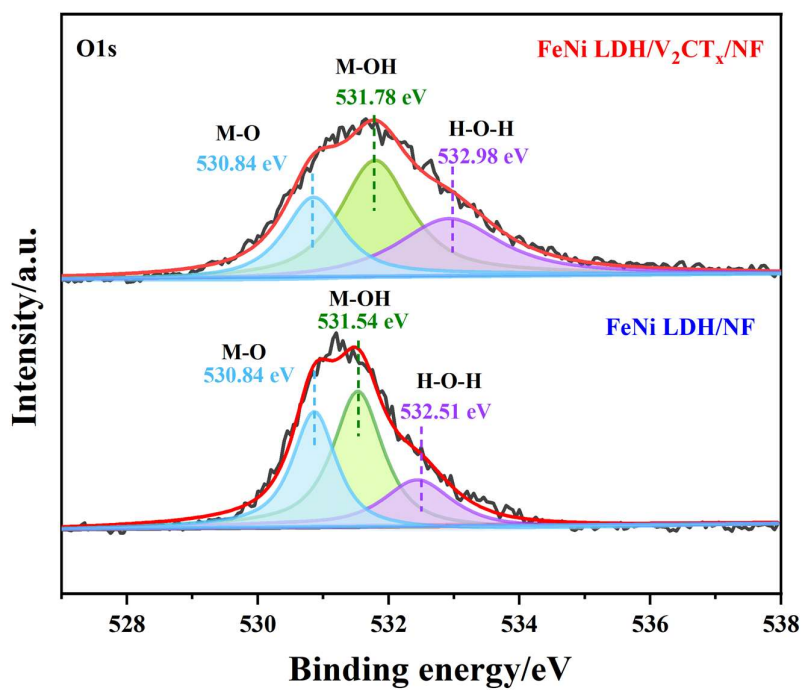

**Figure S8.** O 2p in obtained FeNi LDH/V<sub>2</sub>CT<sub>x</sub>/NF and FeNi LDH/NF.

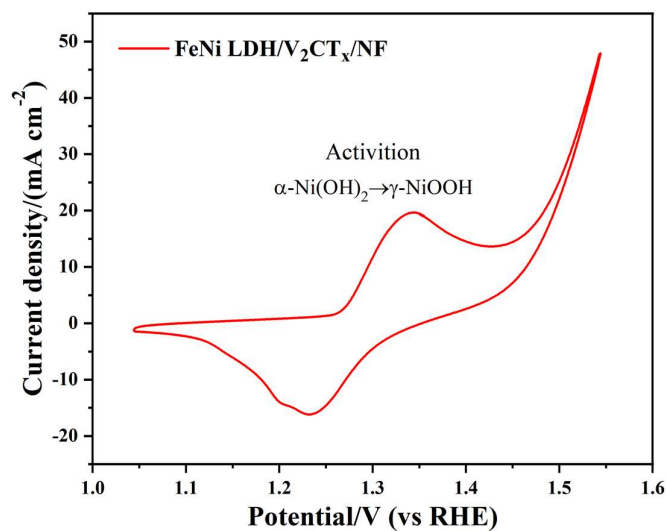

**Figure S9.** CV curves of FeNi LDH/V<sub>2</sub>CT<sub>x</sub>/NF at a scan rate of 50 mV s<sup>-1</sup>.

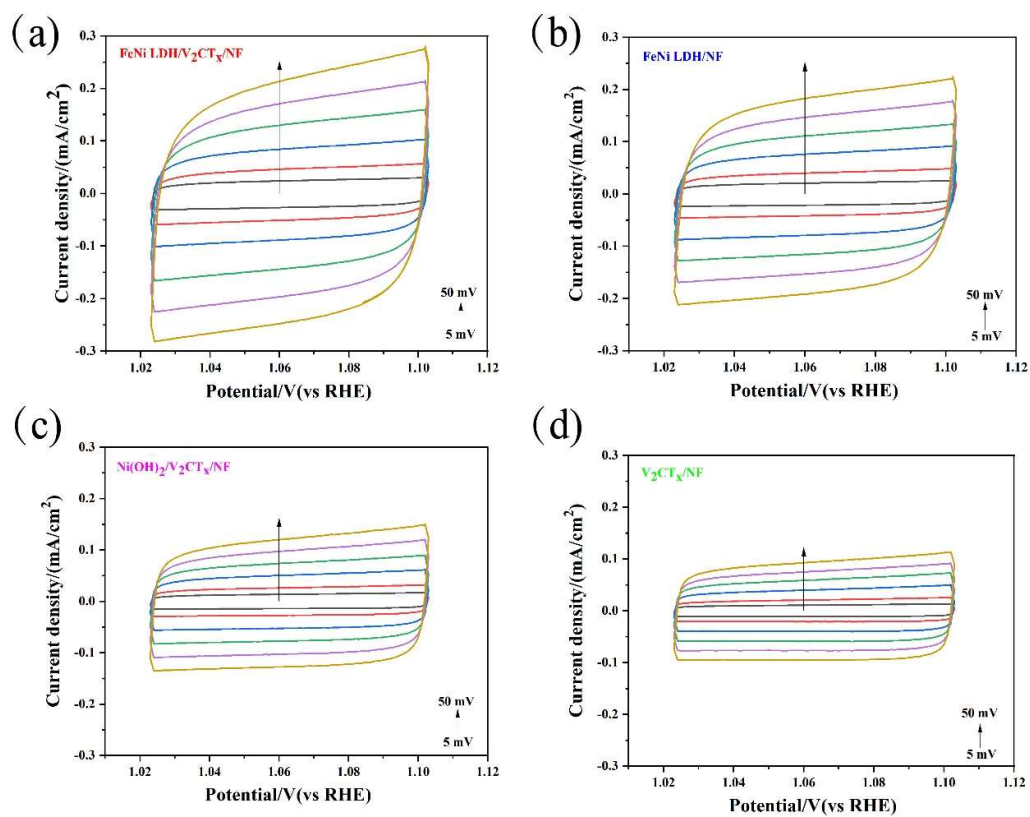

**Figure S10.** CV curves (1.02-1.10 V vs RHE) of (a) FeNi LDH/V<sub>2</sub>CT<sub>x</sub>/NF, (b) FeNi LDH/NF, (c) Ni(OH)<sub>2</sub> LDH/V<sub>2</sub>CT<sub>x</sub>/NF and (d) V<sub>2</sub>CT<sub>x</sub>/NF at various scan rate for OER.



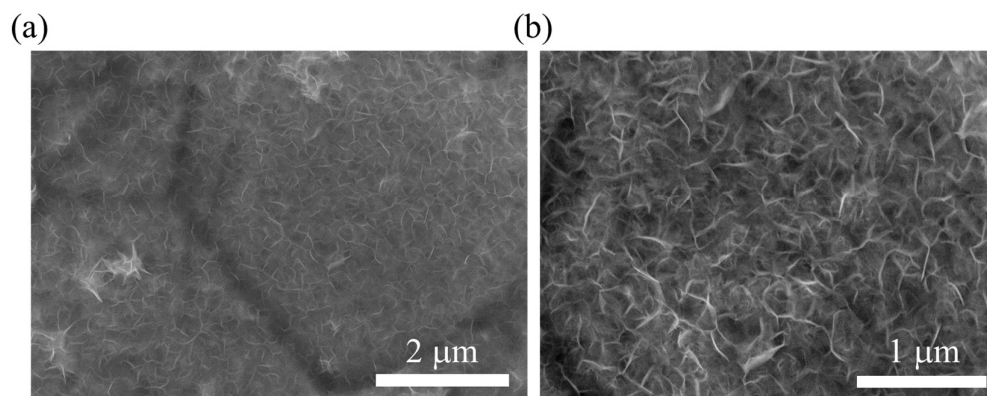

**Figure S11.** the SEM of FeNi LDH/V<sub>2</sub>CT<sub>x</sub>/NF after a 10h OER test.

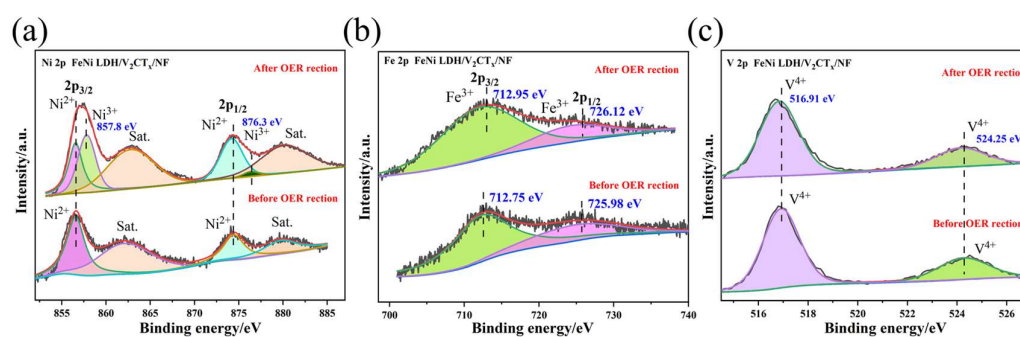

**Figure S12.** High-resolution XPS spectra of (a) Ni 2p, (b) Fe 2p and (c) V 2p in obtained FeNi LDH/V<sub>2</sub>CT<sub>x</sub>/NF and corresponding spectra after OER reaction.

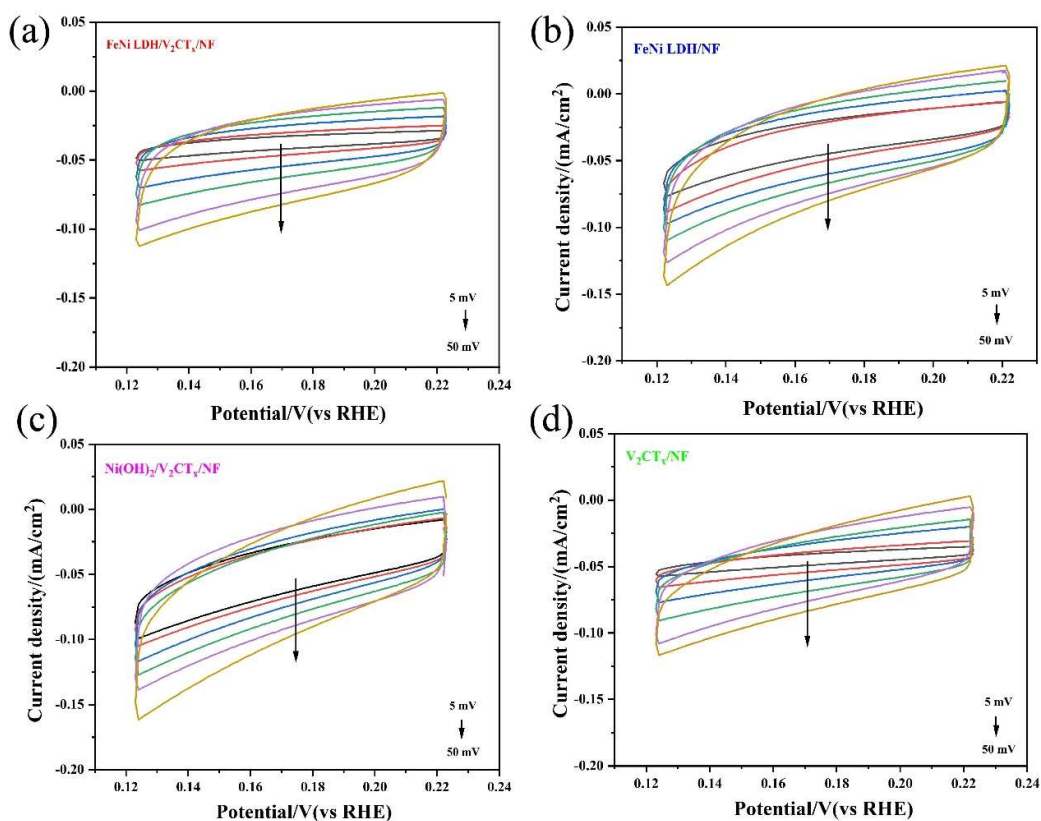

**Figure S13.** CV curves (0.123-0.223 V vs RHE) of (a) FeNi LDH/V<sub>2</sub>CT<sub>x</sub>/NF, (b) FeNi LDH/NF, (c) Ni(OH)<sub>2</sub> LDH/V<sub>2</sub>CT<sub>x</sub>/NF and (d) V<sub>2</sub>CT<sub>x</sub>/NF at various scan rate for HER.

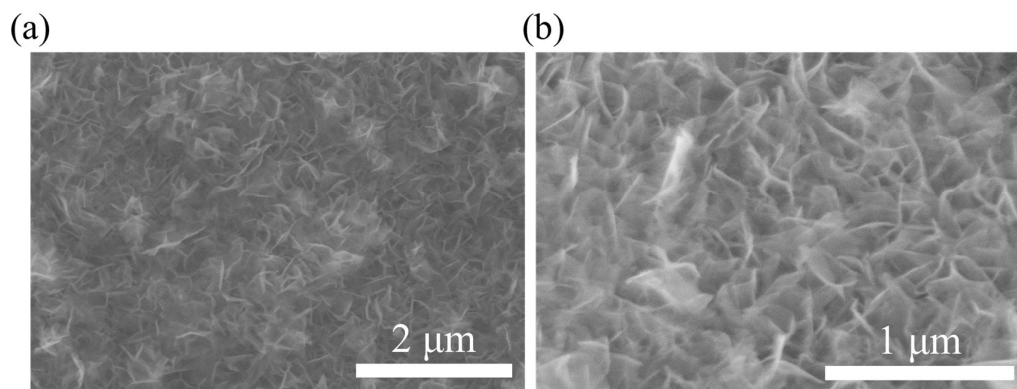

**Figure S14.** the SEM of FeNi LDH/V<sub>2</sub>CT<sub>x</sub>/NF after a 10h HER test.

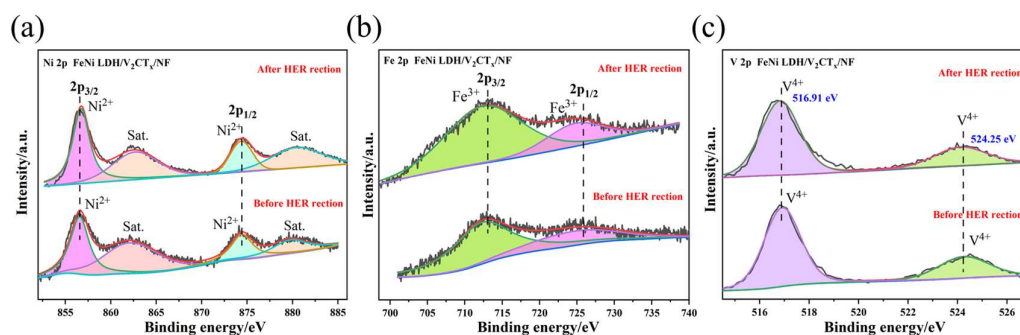

**Figure S15.** High-resolution XPS spectra of (a) Ni 2p, (b) Fe 2p and (c) V 2p in obtained FeNi LDH/V<sub>2</sub>CT<sub>x</sub>/NF and corresponding spectra after HER reaction.

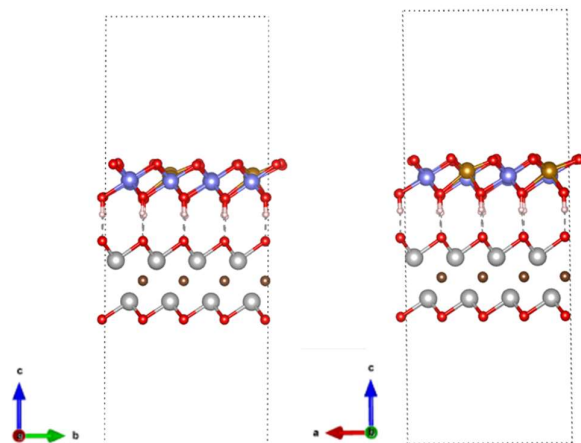

**Figure S16.** The side view of model structure of FeNi LDH/V<sub>2</sub>CT<sub>x</sub> composite.

**Table S1.** Comparison of  $\eta_{10}$  and Tafel slope OER between FeNi LDH/V<sub>2</sub>CT<sub>x</sub>/NF in this work and various Ni/Fe-based catalysts recently reported.

| Materials                                                                     | $\eta_{10}$ mV | Tafel slope | Ref.      |
|-------------------------------------------------------------------------------|----------------|-------------|-----------|
| FeNi LDH/V <sub>2</sub> CT <sub>x</sub> /NF                                   | 222            | 58.7        | This work |
| FeNi LDH/Ti <sub>3</sub> C <sub>2</sub> T <sub>x</sub>                        | 298            | 43          | [1]       |
| NiMn LDH/rGO                                                                  | 280            | 46          | [2]       |
| nNiFe LDH/3D MPC                                                              | 340            | 71          | [3]       |
| NiMo/FG                                                                       | 338            | 67          | [4]       |
| N-CoFe LDH/NF                                                                 | 233            | 40          | [5]       |
| FeMnO NSs                                                                     | 265            | 64          | [6]       |
| CoFe <sub>2</sub> O <sub>4</sub> NSs                                          | 275            | 42          | [7]       |
| CoNi-LDH/Ti <sub>3</sub> C <sub>2</sub> T <sub>x</sub>                        | 257            | 68          | [8]       |
| MOOH/V <sub>4</sub> C <sub>3</sub> T <sub>x</sub>                             | 275            | 51          | [9]       |
| NiFeCe LDH/Ti <sub>3</sub> C <sub>2</sub> T <sub>x</sub>                      | 260            | 43          | [10]      |
| Co <sub>3</sub> O <sub>4</sub> /Ti <sub>3</sub> C <sub>2</sub> T <sub>x</sub> | 300            | 118         | [11]      |
| FeCo LDH/Ti <sub>3</sub> C <sub>2</sub> T <sub>x</sub>                        | 268            | 85          | [12]      |
| MoO <sub>4</sub> <sup>2-</sup> /NiCo <sub>0.5</sub> Fe <sub>0.5</sub> LDH     | 239            | 43          | [13]      |
| NiFeP/Ti <sub>3</sub> C <sub>2</sub> T <sub>x</sub>                           | 286            | 35          | [14]      |



|                                                                                       |     |      |      |
|---------------------------------------------------------------------------------------|-----|------|------|
| H <sub>2</sub> PO <sub>4</sub> <sup>2-</sup> /FeNi LDH/V <sub>2</sub> CT <sub>x</sub> | 250 | 46.5 | [15] |
| MoS <sub>2</sub> /NiFeCr LDH                                                          | 270 | 85   | [16] |
| CoFe LDH/Ti <sub>3</sub> C <sub>2</sub> T <sub>x</sub>                                | 319 | 50   | [17] |
| NiCo LDH/GF                                                                           | 249 | 108  | [18] |

**Table S2.** EIS parameters of synthesized catalysts for OER.

| Materials                                               | Rs(Ω) | CPE-T | CPE-P | Rct(Ω)  |
|---------------------------------------------------------|-------|-------|-------|---------|
| FeNi LDH/V <sub>2</sub> CT <sub>x</sub> /NF             | 1.656 | 0.061 | 0.719 | 3.614   |
| RuO <sub>2</sub> /NF                                    | 1.563 | 0.023 | 0.802 | 2.363   |
| FeNi LDH/NF                                             | 1.407 | 0.098 | 0.744 | 4.275   |
| Ni(OH) <sub>2</sub> /V <sub>2</sub> CT <sub>x</sub> /NF | 1.815 | 0.094 | 0.645 | 42.270  |
| V <sub>2</sub> CT <sub>x</sub> /NF                      | 0.975 | 0.006 | 0.824 | 115.600 |
| NF                                                      | 0.972 | 0.004 | 0.834 | 152.200 |

**Table S3.** EIS parameters of synthesized catalysts for HER.

| Materials                                               | Rs(Ω) | CPE-T   | CPE-P | Rct(Ω) |
|---------------------------------------------------------|-------|---------|-------|--------|
| FeNi LDH/V <sub>2</sub> CT <sub>x</sub> /NF             | 0.991 | 0.00077 | 0.850 | 10.85  |
| Pt/C/NF                                                 | 1.998 | 0.0074  | 0.833 | 8.963  |
| FeNi LDH/NF                                             | 1.061 | 0.00028 | 0.902 | 12.36  |
| Ni(OH) <sub>2</sub> /V <sub>2</sub> CT <sub>x</sub> /NF | 0.936 | 0.0006  | 0.875 | 24.73  |
| V <sub>2</sub> CT <sub>x</sub> /NF                      | 0.914 | 0.00115 | 0.868 | 67.4   |
| NF                                                      | 0.957 | 0.00109 | 0.826 | 106.1  |

**Table S4.** The current density of overall water splitting (50 mA cm<sup>-2</sup>) values between FeNi LDH/V<sub>2</sub>CT<sub>x</sub>/NF in this work and various Ni/Fe-based catalysts recently reported.

| Materials                                   | Electrolyte | voltage (V) | Ref.      |
|---------------------------------------------|-------------|-------------|-----------|
| FeNi LDH/V <sub>2</sub> CT <sub>x</sub> /NF | 1M KOH      | 1.74        | This work |

|                                                                      |        |      |      |
|----------------------------------------------------------------------|--------|------|------|
| CoS <sub>2</sub> /Ti <sub>3</sub> C <sub>2</sub> T <sub>x</sub>      | 1M KOH | 1.78 | [19] |
| FeNi/Mo <sub>2</sub> TiC <sub>2</sub> T <sub>x</sub> /NF             | 1M KOH | 1.74 | [20] |
| NiFe LDH/NiCoP/NF                                                    | 1M KOH | 1.75 | [21] |
| NiCo <sub>2</sub> S <sub>4</sub> @NiFe- LDH/NF                       | 1M KOH | 1.83 | [22] |
| CoNi <sub>2</sub> S <sub>4</sub> /Ni <sub>3</sub> S <sub>2</sub> @NF | 1M KOH | 1.83 | [23] |
| NiCo-LDH/NF                                                          | 1M KOH | 1.86 | [24] |
| NiFe LDH/Ni(OH) <sub>2</sub> /NF                                     | 1M KOH | 1.74 | [25] |

**Table S5.** Comparison of  $\eta_{10}$  and Tafel slope HER between FeNi LDH/V<sub>2</sub>CT<sub>x</sub>/NF in this work and various LDH catalysts recently reported.

| Materials                                                | $\eta_{10}$ mV | Tafel slope | Ref.      |
|----------------------------------------------------------|----------------|-------------|-----------|
| FeNi LDH/V <sub>2</sub> CT <sub>x</sub> /NF              | 151            | 136         | This work |
| NiFe LDH/NiCoP/NF                                        | 145            | 88.2        | [21]      |
| NiFeCo LDH/NF                                            | 150            | 73          | [26]      |
| A-NiCo LDH/NF                                            | 151            | 57          | [27]      |
| FeCo LDH/PANI/NF                                         | 168            | 115         | [28]      |
| MoP/NiCo-LDH/NF                                          | 170            | 145         | [29]      |
| FeNi/Mo <sub>2</sub> TiC <sub>2</sub> T <sub>x</sub> /NF | 175            | 103.5       | [20]      |

## References

1. Yu, M.; Zhou, S.; Wang, Z.; Zhao, J.; Qiu, J. Boosting electrocatalytic oxygen evolution by synergistically coupling layered double hydroxide with MXene. *Nano Energy* **2018**, *44*, 181–190. <https://doi.org/10.1016/j.nanoen.2017.12.003>.
2. Ma, W.; Ma, R.; Wu, J.; Sun, P.; Liu, X.; Zhou, K.; Sasaki, T. Development of efficient electrocatalysts via molecular hybridization of NiMn layered double hydroxide nanosheets and graphene. *Nanoscale* **2016**, *8*, 1042510432. doi:10.1039/c6nr00988c.
3. Wang, W.; Liu, Y.; Li, J.; Luo, J.; Fu, L.; Chen, S. NiFe LDH nanodots anchored on 3D macro/mesoporous carbon as a high-performance ORR/OER bifunctional electrocatalyst. *J. Mater. Chem. A* **2018**, *6*, 14299–14306. doi:10.1039/c8ta05295f.
4. Jeong, S.; Hu, K.; Ohto, T.; Nagata, Y.; Masuda, H.; Fujita, J.-i.; Ito, Y. Effect of graphene encapsulation of NiMo alloys on oxygen evolution reaction. *ACS Catal.* **2019**, *10*, 792–799. doi:10.1021/acscatal.9b04134.
5. Wang, Y.; Xie, C.; Zhang, Z.; Liu, D.; Chen, R.; Wang, S. In Situ Exfoliated, N-Doped, and Edge-Rich Ultrathin Layered Double Hydroxides Nanosheets for Oxygen Evolution Reaction. *Adv. Funct. Mater.* **2018**, *28*, 1703363. doi:10.1002/adfm.201703363.
6. Teng, Y.; Wang, X.D.; Liao, J.F.; Li, W.G.; Chen, H.Y.; Dong, Y.J.; Kuang, D.B. Atomically thin defect-rich Fe-Mn-O hybrid nanosheets as high efficient electrocatalyst for water oxidation. *Adv. Funct. Mater.* **2018**, *28*, 1802463. doi:10.1002/adfm.201802463.
7. Fang, H.; Huang, T.; Liang, D.; Qiu, M.; Sun, Y.; Yao, S.; Yu, J.; Dinesh, M.M.; Guo, Z.; Xia, Y. Prussian blue analog-derived 2D ultrathin CoFe<sub>2</sub>O<sub>4</sub> nanosheets as high-activity electrocatalysts

for the oxygen evolution reaction in alkaline and neutral media. *J. Mater. Chem. A* **2019**, *7*, 7328–7332. doi:10.1039/C9TA00640K.

8. Hu, L.; Li, M.; Wei, X.; Wang, H.; Wu, Y.; Wen, J.; Gu, W.; Zhu, C. Modulating interfacial electronic structure of CoNi LDH nanosheets with Ti<sub>3</sub>C<sub>2</sub>T MXene for enhancing water oxidation catalysis. *Chem. Eng. J.* **2020**, *398*, 125605. <https://doi.org/10.1016/j.cej.2020.125605>.
9. Du, C.F.; Sun, X.; Yu, H.; Fang, W.; Jing, Y.; Wang, Y.; Li, S.; Liu, X.; Yan, Q. V<sub>4</sub>C<sub>3</sub>T<sub>x</sub> MXene: A promising active substrate for reactive surface modification and the enhanced electrocatalytic oxygen evolution activity. *InfoMat* **2020**, *2*, 950–959. doi:10.1002/inf2.12078.
10. Wen, Y.; Wei, Z.; Liu, J.; Li, R.; Wang, P.; Zhou, B.; Zhang, X.; Li, J.; Li, Z. Synergistic cerium doping and MXene coupling in layered double hydroxides as efficient electrocatalysts for oxygen evolution. *J. Energy Chem.* **2021**, *52*, 412–420. doi:10.1016/j.jechem.2020.04.009.
11. Lu, Y.; Fan, D.; Chen, Z.; Xiao, W.; Cao, C.; Yang, X. Anchoring Co<sub>3</sub>O<sub>4</sub> nanoparticles on MXene for efficient electrocatalytic oxygen evolution. *Sci Bull* **2020**, *65*, 460–466. doi:10.1016/j.scib.2019.12.020
12. Tian, M.; Jiang, Y.; Tong, H.; Xu, Y.; Xia, L. MXene-Supported FeCo-LDHs as Highly Efficient Catalysts for Enhanced Electrocatalytic Oxygen Evolution Reaction. *ChemNanoMat* **2019**, *6*, 154–159. <https://doi.org/10.1002/cnma.201900613>.
13. Liu, Q.; Zhou, F.; Bai, Y.; Hu, W. Evaluating Properties of Carbon-Free Nano-NiCoFe-LDHs with Molybdate as Oxygen Evolution Catalysts and Their Applications in Rechargeable Air Electrodes. *Energ Fuel* **2021**, *35*, 20374–20385. doi:10.1021/acs.energyfuels.1c03475.
14. Chen, J.; Long, Q.; Xiao, K.; Ouyang, T.; Li, N.; Ye, S.; Liu, Z.-Q. Vertically-interlaced NiFeP/MXene electrocatalyst with tunable electronic structure for high-efficiency oxygen evolution reaction. *Sci. Bull* **2021**, *66*, 1063–1072. doi:10.1016/j.scib.2021.02.033.
15. Chen, Y.; Yao, H.; Kong, F.; Tian, H.; Meng, G.; Wang, S.; Mao, X.; Cui, X.; Hou, X.; Shi, J. V<sub>2</sub>C MXene synergistically coupling FeNi LDH nanosheets for boosting oxygen evolution reaction. *Appl. Catal. B Environ.* **2021**, *297*, 120474. <https://doi.org/10.1016/j.apcatb.2021.120474>
16. Chen, S.; Yu, C.; Cao, Z.; Huang, X.; Wang, S.; Zhong, H. Trimetallic NiFeCr-LDH/MoS<sub>2</sub> composites as novel electrocatalyst for OER. *Int. J. Hydrogen Energ.* **2021**, *46*, 7037–7046. doi:10.1016/j.ijhydene.2020.11.249.
17. Hao, C.; Wu, Y.; An, Y.; Cui, B.; Lin, J.; Li, X.; Wang, D.; Jiang, M.; Cheng, Z.; Hu, S. Interface-coupling of CoFe-LDH on MXene as high-performance oxygen evolution catalyst. *Mater. Today Energy* **2019**, *12*, 453–462. doi:10.1016/j.mtener.2019.04.009.
18. Ye, C.; Zhang, L.; Yue, L.; Deng, B.; Cao, Y.; Liu, Q.; Luo, Y.; Lu, S.; Zheng, B.; Sun, X. A NiCo LDH nanosheet array on graphite felt: an efficient 3D electrocatalyst for the oxygen evolution reaction in alkaline media. *Inorg. Chem. Front.* **2021**, *8*, 3162–3166. doi:10.1039/d1qi00428j.
19. Han, S.; Chen, Y.; Hao, Y.; Xie, Y.; Xie, D.; Chen, Y.; Xiong, Y.; He, Z.; Hu, F.; Li, L.; et al. Multi-dimensional hierarchical CoS<sub>2</sub>@MXene as trifunctional electrocatalysts for zinc-air batteries and overall water splitting. *Sci. China Mater.* **2020**, *64*, 1127–1138. doi:10.1007/s40843-020-1524-5.
20. Wang, J.; He, P.; Shen, Y.; Dai, L.; Li, Z.; Wu, Y.; An, C. FeNi nanoparticles on Mo<sub>2</sub>TiC<sub>2</sub>T<sub>x</sub> MXene@nickel foam as robust electrocatalysts for overall water splitting. *Nano Res.* **2021**, *14*, 3474–3481. doi:10.1007/s12274-021-3660-0.
21. Zhang, H.; Li, X.; Hähnel, A.; Naumann, V.; Lin, C.; Azimi, S.; Schweizer, S.L.; Maijenburg, A.W.; Wehrspohn, R.B. Bifunctional Heterostructure Assembly of NiFe LDH Nanosheets on NiCoP Nanowires for Highly Efficient and Stable Overall Water Splitting. *Adv. Funct. Mater.* **2018**, *28*, 1706847. <https://doi.org/10.1002/adfm.201706847>.
22. Liu, J.; Wang, J.; Zhang, B.; Ruan, Y.; Lv, L.; Ji, X.; Xu, K.; Miao, L.; Jiang, J. Hierarchical NiCoS<sub>4</sub>@NiFe LDH Heterostructures Supported on Nickel Foam for Enhanced Overall-Water-Splitting Activity. *ACS Appl. Mater. Interfaces* **2017**, *9*, 15364–15372. <https://doi.org/10.1021/acsami.7b00019>.
23. Dai, W.; Ren, K.; Zhu, Y.-a.; Pan, Y.; Yu, J.; Lu, T. Flower-like CoNi<sub>2</sub>S<sub>4</sub>/Ni<sub>3</sub>S<sub>2</sub> nanosheet clusters on nickel foam as bifunctional electrocatalyst for overall water splitting. *J. Alloy Compd.* **2020**, *844*, 156252. doi:10.1016/j.jallcom.2020.156252.

24. Liu, W.; Bao, J.; Guan, M.; Zhao, Y.; Lian, J.; Qiu, J.; Xu, L.; Huang, Y.; Qian, J.; Li, H. Nickel-cobalt-layered double hydroxide nanosheet arrays on Ni foam as a bifunctional electrocatalyst for overall water splitting. *Dalton Trans.* **2017**, *46*, 8372–8376. <https://doi.org/10.1039/c7dt00906b>.
25. Gultom, N.S.; Abdullah, H.; Hsu, C.-N.; Kuo, D.-H. Activating nickel iron layer double hydroxide for alkaline hydrogen evolution reaction and overall water splitting by electrodepositing nickel hydroxide. *Chem. Eng. J.* **2021**, *419*, 129608. doi:10.1016/j.cej.2021.129608.
26. Babar, P.; Lokhande, A.; Karade, V.; Pawar, B.; Gang, M.G.; Pawar, S.; Kim, J.H. Bifunctional 2D Electrocatalysts of Transition Metal Hydroxide Nanosheet Arrays for Water Splitting and Urea Electrolysis. *ACS Sustain. Chem. Eng.* **2019**, *7*, 10035–10043. doi:10.1021/acssuschemeng.9b01260.
27. Yang, H.; Chen, Z.; Guo, P.; Fei, B.; Wu, R. B-doping-induced amorphization of LDH for large-current-density hydrogen evolution reaction. *Appl. Catal. B-Environ.* **2020**, *261*, 118240. doi:10.1016/j.apcatb.2019.118240.
28. Han, X.; Lin, Z.; He, X.; Cui, L.; Lu, D. The construction of defective FeCo-LDHs by in-situ polyaniline curved strategy as a desirable bifunctional electrocatalyst for OER and HER. *Int. J. Hydrogen Energy* **2020**, *45*, 26989–26999. <https://doi.org/10.1016/j.ijhydene.2020.07.006>.
29. Wang, T.; Wu, H.; Feng, C.; Zhang, L.; Zhang, J. MoP@NiCo-LDH on nickel foam as bifunctional electrocatalyst for high efficiency water and urea–water electrolysis. *J. Mater. Chem. A* **2020**, *8*, 18106–18116. <https://doi.org/10.1039/d0ta06030e>.
